# Supplementary material
Source: PubMed Central journal article supplement (PMC4111394)
Supplement: supp_mcu116_mcu116supp.pdf [file supp_mcu116_mcu116supp.pdf]

APPENDIX 1: Voucher information for the samples analyzed for the nuclear ribosomal spacer ITS2 and plastid datasets. The number of ribotypes (nrITS2 haplotypes) for each accession, ribotype diversity (Rd), nucleotide diversity per site (Nd), sequence length variation, and GC-content were calculated for sequences for each accession (compare Fig. 1, 3, and 5; Table 1). Letters A-H indicate the major clades in the ITS2 tree (Fig. 3). Ploidy levels are those reported in Talent and Dickinson (2005), Lo *et al.* (2007, 2013), or J. Coughlan and N. Talent (unpubl. data). Species are listed in the same order as in Table 1. All vouchers are deposited in the Green Plant Herbarium of the Royal Ontario Museum (TRT) except as noted. USA states and Canadian provinces, as well as the field collection numbers, are provided for the localities. Field collection numbers if not otherwise identified are those of J. Coughlan (JC), TAD (year-number, BB, PORE, and s.n.), E. Y. Y. Lo (EL), J. B. Phipps (JBP), M. Purich (MP), and N. Talent (NT). *Crataegus triflora* did not amplify for ITS2. Samples used in amplification of plastid markers indicated by an asterisk.

| Species                 | Voucher                         | Nd           | Rd           | GC-content | No. of ribotypes | Distribution of ribotypes (Fig. 3) | Sequence length |
|-------------------------|---------------------------------|--------------|--------------|------------|------------------|------------------------------------|-----------------|
| <i>C. brachyacantha</i> | Louisiana: C. Reid<br>5206 (2x) | 0.004 ±0.002 | 0.694 ±0.147 | 0.685      | 4                | basal                              | 340             |
|                         | Louisiana: 2003-32<br>(2x)*     | 0.005 ±0.002 | 0.727 ±0.113 | 0.678      | 5                | basal                              | 340             |

|                       |                                 |              |              |       |    |       |              |
|-----------------------|---------------------------------|--------------|--------------|-------|----|-------|--------------|
|                       | Loisiana: 2011-2 (2x)           | 0.055 ±0.029 | 0.952 ±0.096 | 0.624 | 6  | basal | 312, 340     |
| <i>C. crus-galii</i>  | Alabama: NT213a<br>(2x)*        | 0.013 ±0.002 | 0.895 ±0.059 | 0.685 | 12 | E     | 341-242, 344 |
| <i>C. macracantha</i> | Ontario: NT224 (4x)*            | 0.014 ±0.002 | 0.892 ±0.063 | 0.684 | 10 | E     | 344          |
|                       | Colorado: NT440 (4x)            | 0.04 ±0.017  | 0.992 ±0.025 | 0.677 | 14 | E     | 344-345      |
|                       | Montana: 2001-17 (4x)           | 0.01 ±0.002  | 0.857 ±0.090 | 0.682 | 10 | E     | 344          |
| <i>C. punctata</i>    | Ontario: MP73 (2x)              | 0.014 ±0.004 | 0.879 ±0.075 | 0.684 | 8  | E     | 344          |
|                       | Ontario: BB4 (2x)               | 0.013 ±0.003 | 1.00 ±0.096  | 0.686 | 6  | E     | 344          |
|                       | Ontario: s.n. (2x)*             | 0.015 ±0.003 | 0.900 ±0.161 | 0.679 | 4  | E     | 344          |
| <i>C. chrysocarpa</i> | Washington: s.n. (4x)*          | 0.016 ±0.002 | 0.967 ±0.036 | 0.672 | 13 | E     | 343 - 344    |
| <i>C. triflora</i>    | Georgia: NT290 (4x)*            | -            | -            | -     | -  | -     | -            |
| <i>C. chrysocarpa</i> | British Columbia:<br>NT587 (4x) | 0.021 ±0.004 | 0.949 ±0.042 | 0.684 | 10 | E     | 342-344      |
| <i>C. monogyna</i>    | Oregon: EL-74 (2x)              | 0.002 ±0.001 | 0.533 ±0.180 | 0.675 | 5  | A2    | 341-342      |

|                              |                                                |              |              |       |    |     |              |
|------------------------------|------------------------------------------------|--------------|--------------|-------|----|-----|--------------|
|                              | Ontario: MP84 (2x)*                            | 0.004 ±0.001 | 0.806 ±0.120 | 0.673 | 6  | A2  | 341-342      |
|                              | British Columbia:<br>2008-26 (2x)              | 0.01 ±0.001  | 0.933 ±0.077 | 0.672 | 8  | A2  | 340-341      |
|                              | Ontario: MP98 (2x)                             | 0.004 ±0.001 | 0.758 ±0.122 | 0.675 | 7  | A2  | 341-343      |
| <b><i>C. pentagyna</i></b>   | Denmark: K. I Christensen<br><i>s.n.</i> (2x)* | 0.003 ±0.001 | 0.867 ±0.107 | 0.697 | 7  | A3  | 341          |
| <b><i>C. pinnatifida</i></b> | Russia: T. Romankova<br>2 (2x)*                | 0.008 ±0.001 | 0.893 ±0.111 | 0.668 | 6  | A1  | 342          |
|                              | Russia: T. Romankova<br>6 (2x)                 | 0.006 ±0.002 | 0.933 ±0.062 | 0.668 | 7  | A1  | 342          |
|                              | Russia: T. Romankova<br>3 (2x)                 | 0.007 ±0.001 | 0.972 ±0.064 | 0.667 | 8  | A1  | 342          |
| <b><i>C. erythropoda</i></b> | Colorado: NT349<br>(4x)*                       | 0.025 ±0.005 | 0.909 ±0.079 | 0.657 | 10 | E+F | 296, 343-344 |
|                              | New Mexico: NT358<br>(4x)                      | 0.029 ±0.003 | 0.978 ±0.054 | 0.675 | 9  | E+F | 342-344      |

|                                 |                                        |              |              |       |    |     |           |
|---------------------------------|----------------------------------------|--------------|--------------|-------|----|-----|-----------|
| <b><i>C. rivularis</i></b>      | Wyoming: 2001-42<br>(4x)*              | 0.005 ±0.002 | 0.682 ±0.148 | 0.658 | 6  | E+F | 309, 343  |
|                                 | Nevada: 2007-03 (4x)                   | 0.014 ±0.005 | 0.895 ±0.070 | 0.677 | 10 | E+F | 343-344   |
|                                 | Idaho: EL-199 (4x)                     | 0.017 ±0.005 | 0.912 ±0.059 | 0.68  | 10 | E+F | 343-344   |
|                                 | Colorado: NT373<br>(4x)*               | 0.024 ±0.006 | 0.900 ±0.161 | 0.682 | 4  | E+F | 343-344   |
|                                 | Utah: 2001-05 (4x)                     | 0.027 ±0.003 | 0.939 ±0.058 | 0.681 | 9  | E+F | 343-344   |
| <b><i>C. saligna</i></b>        | Utah: 2004-05 (2x)                     | 0.006 ±0.002 | 0.786 ±0.113 | 0.678 | 4  | F   | 343       |
|                                 | Colorado: NT371 (2x)                   | 0.007 ±0.003 | 0.722 ±0.159 | 0.678 | 5  | F   | 343       |
|                                 | Colorado: NT368 (2x)                   | 0.006 ±0.001 | 0.917 ±0.092 | 0.669 | 8  | F   | 331 & 343 |
| <b><i>C. castlegarensis</i></b> | Oregon: R. M. Love<br>C-2003-23F (4x)* | 0.031 ±0.004 | 1 ±0.076     | 0.677 | 7  | E+H | 342-344   |
|                                 | California: 2006-13<br>(4x)            | 0.007 ±0.001 | 0.971 ±0.032 | 0.676 | 14 | E+H | 343-344   |
|                                 | Saskatchewan: 2007-                    | 0.013 ±0.002 | 0.895        | 0.684 | 13 | E+H | 343-344   |

|                            |                       |                   |                   |       |    |     |           |
|----------------------------|-----------------------|-------------------|-------------------|-------|----|-----|-----------|
|                            | 15 (4x)               |                   | $\pm 0.0047$      |       |    |     |           |
|                            | Idaho: EL-192 (4x)    | $0.033 \pm 0.002$ | $0.993 \pm 0.023$ | 0.672 | 16 | E+H | 342-344   |
| <b><i>C. douglasii</i></b> | Ontario: EL-11 (4x)   | $0.027 \pm 0.002$ | $0.941 \pm 0.041$ | 0.678 | 13 | E+H | 343 - 344 |
|                            | Ontario: 2007-22 (4x) | $0.025 \pm 0.002$ | $0.912 \pm 0.056$ | 0.676 | 11 | E+H | 343-344   |
|                            | Idaho: EL-166 (4x)    | $0.028 \pm 0.003$ | $0.967 \pm 0.036$ | 0.676 | 13 | E+H | 343 - 344 |
|                            | Montana: EL-32 (4x)   | $0.028 \pm 0.003$ | $0.971 \pm 0.033$ | 0.677 | 12 | E+H | 342-344   |
|                            | British Columbia:     | $0.03 \pm 0.002$  | $0.967 \pm 0.030$ | 0.679 | 14 | E+H | 343-345   |
|                            | 2010-28 (4x)          |                   |                   |       |    |     |           |
|                            | British Columbia:     | $0.036 \pm 0.005$ | $0.962 \pm 0.040$ | 0.639 | 12 | E+H | 343-345   |
|                            | 2010-29 (4x)          |                   |                   |       |    |     |           |
|                            | British Columbia:     | $0.03 \pm 0.003$  | $0.962 \pm 0.034$ | 0.674 | 13 | E+H | 343-344   |
|                            | 2010-36 (4x)*         |                   |                   |       |    |     |           |
|                            | Ontario: NT611 (4x)   | $0.017 \pm 0.005$ | $0.867 \pm 0.079$ | 0.674 | 10 | E+H | 343-345   |
|                            | British Columbia:     | $0.044 \pm 0.015$ | 0.838             | 0.669 | 7  | E+H | 343-344   |
|                            | JC387 (4x)*           |                   | $\pm 0.01534$     |       |    |     |           |

|                               |                                    |                  |              |       |    |     |                |
|-------------------------------|------------------------------------|------------------|--------------|-------|----|-----|----------------|
|                               | British Columbia:<br>2008-72 (4x)  | 0.03 ±0.004      | 0.905 ±0.103 | 0.671 | 4  | E+H | 343-344        |
|                               | British Columbia:<br>2010-38 (5x)* | 0.026 ±0.002     | 0.915 ±0.039 | 0.675 | 18 | E+H | 342, 343 - 344 |
|                               | British Columbia:<br>2010-31 (5x)* | 0.03<br>±0.00218 | 0.952 ±0.032 | 0.647 | 20 | E+H | 343 - 344      |
|                               | Montana: JC296 (4x)                | 0.039 ±0.006     | 0.933 ±0.122 | 0.671 | 5  | E+H | 343-344        |
| <b><i>C. okennonii</i></b>    | Washington: EL-152<br>(4x)*        | 0.024 ±0.004     | 0.971 ±0.104 | 0.675 | 14 | E+H | 343 - 344      |
|                               | Montana: JC281 (4x)                | 0.027 ±0.005     | 1 ±0.034     | 0.683 | 12 | E+H | 342-344        |
|                               | Washington: EL-153<br>(4x)         | 0.021 ±0.004     | 0.895 ±0.032 | 0.674 | 10 | E+H | 343 - 344      |
| <b><i>C. shuswapensis</i></b> | British Columbia:<br>2007-11 (4x)* | 0.022 ±0.004     | 0.879 ±0.075 | 0.679 | 7  | E+F | 343-345        |
| <b><i>C. suksdorfii</i></b>   | Washington: P. Zika<br>18485 (2x)* | 0.014 ±0.002     | 0.964 ±0.051 | 0.671 | 9  | H   | 343 - 344      |

|                             |              |              |       |    |   |           |
|-----------------------------|--------------|--------------|-------|----|---|-----------|
| California: 2006-22<br>(2x) | 0.011 ±0.001 | 0.945 ±0.054 | 0.676 | 9  | H | 343 - 344 |
| California: 2006-16<br>(2x) | 0.011 ±0.002 | 0.909 ±0.065 | 0.675 | 9  | H | 343 - 344 |
| Oregon: JC092 (2x)          | 0.013 ±0.002 | 0.956 ±0.059 | 0.673 | 9  | H | 343       |
| Oregon: JC119 (2x)          | 0.01 ±0.002  | 0.917 ±0.092 | 0.675 | 7  | H | 343-344   |
| Oregon: EL-68 (2x)          | 0.016 ±0.002 | 0.982 ±0.046 | 0.674 | 10 | H | 343-344   |
| Oregon: EL-71 (2x)          | 0.016 ±0.003 | 1 ±0.096     | 0.674 | 6  | H | 343-344   |
| Oregon: JC039 (2x)          | 0.004 ±0.001 | 0.694 ±0.147 | 0.677 | 8  | H | 342-344   |
| Oregon: JC060 (2x)          | 0.014 ±0.002 | 1 ±0.096     | 0.676 | 6  | H | 343-344   |
| Oregon: JC098 (2x)          | 0.015 ±0.002 | 0.982 ±0.045 | 0.673 | 10 | H | 343, 352  |
| Oregon: JC136 (2x)          | 0.007 ±0.001 | 0.756 ±0.130 | 0.676 | 7  | H | 343-344   |
| Oregon: JC102 (2x)          | 0.01 ±0.002  | 0.933 ±0.122 | 0.674 | 5  | H | 343       |
| Oregon: JC117 (2x)          | 0.006 ±0.03  | 0.667 ±0.314 | 0.625 | 2  | H | 343-344   |

|                              |                                    |              |              |       |    |       |                  |
|------------------------------|------------------------------------|--------------|--------------|-------|----|-------|------------------|
|                              | Oregon: JC118 (2x)                 | 0.015 ±0.002 | 1.00 ±0.096  | 0.672 | 6  | H     | 343-344          |
|                              | Oregon: EL-65 (3x)                 | 0.007 ±0.002 | 0.872 ±0.067 | 0.679 | 7  | H     | 343-344          |
|                              | Idaho: EL-172 (3x)*                | 0.003 ±0.002 | 0.295 ±0.156 | 0.674 | 3  | H     | 343-344          |
|                              | Idaho: EL-188 (3x)                 | 0.011 ±0.002 | 0.927 ±0.066 | 0.677 | 8  | H     | 343 - 344        |
|                              | British Columbia:<br>2010-42 (3x)* | 0.033 ±0.004 | 0.978 ±0.054 | 0.655 | 10 | F+H   | 298, 342-344     |
|                              | British Columbia:<br>JC385 (3x)*   | 0.03 ±0.003  | 0.982 ±0.046 | 0.675 | 10 | E+F+H | 341, 343-344     |
|                              | Montana: EL-30 (4x)                | 0.021 ±0.003 | 0.940 ±0.031 | 0.672 | 18 | E+H   | 343 - 344        |
|                              | British Columbia:<br>2008-38 (5x)  | 0.04 ±0.007  | 0.974 ±0.022 | 0.666 | 16 | E+H   | 340, 343-344     |
| <b><i>C. gaylussacia</i></b> | California: PORE-509-<br>1 (3x)*   | 0.023 ±0.013 | 0.773 ±0.128 | 0.665 | 7  | H     | 336, 343-344     |
|                              | California: JC005 (3x)             | 0.007 ±0.002 | 0.731 ±0.113 | 0.65  | 8  | H     | 290, 336 & 344   |
|                              | California: JC014 (3x)             | 0.009 ±0.002 | 0.844 ±0.101 | 0.68  | 6  | H     | 335-336, 343-344 |



|                           |                                          |                 |                   |       |    |     |             |
|---------------------------|------------------------------------------|-----------------|-------------------|-------|----|-----|-------------|
|                           | California: JC018 (3x)                   | 0.007 ±0.002    | 0.800 ±0.114      | 0.669 | 6  | H   | 336, 343    |
|                           | Oregon: EL-57 (3x)                       | 0.011 ±0.002    | 0.927 ±0.066      | 0.664 | 9  | H   | 309, 343    |
| <i>C. rivuloadamensis</i> | Saskatchewan: 2007-<br>13 (4x)*          | 0.025 ±0.004    | 1 ±0.030          | 0.672 | 13 | E+H | 343-344     |
| <i>C. rivulopugnensis</i> | Saskatchewan: 2007-<br>21 (4x)*          | 0.029<br>±0.039 | 0.974 ±0.039      | 0.673 | 11 | E+H | 343-344     |
| <i>C. aquacervensis</i>   | Saskatchewan: 2007-<br>12 (4x)*          | 0.03 ±0.002     | 0.936 ±0.051      | 0.675 | 9  | E+H | 343-344     |
| <i>C. atrovirens</i>      | British Columbia:<br>JBP8344*            | 0.03 ±0.002     | 0.989 ±0.031      | 0.675 | 13 | E+H | 343-344     |
| <i>C. cupressocollina</i> | Saskatchewan: 2007-<br>20 (4x)*          | 0.029 ±0.002    | 0.952<br>±0.00163 | 0.674 | 11 | E+H | 344         |
| <i>C. enderbyensis</i>    | British Columbia: P.<br>Zika 18445 (4x)* | 0.03 ±0.004     | 0.962 ±0.040      | 0.675 | 12 | E+H | 343-344     |
| <i>C. okanaganensis</i>   | British Columbia:<br>2008-46 (4x)*       | 0.023 ±0.006    | 0.972 ±0.064      | 0.661 | 8  | E+H | 272,342-344 |

|                         |                                                      |              |              |       |    |       |             |
|-------------------------|------------------------------------------------------|--------------|--------------|-------|----|-------|-------------|
| <i>C. okanaganensis</i> | British Columbia: P.                                 | 0.033 ±0.004 | 0.978 ±0.031 | 0.676 | 15 | E+H   | 341,343-343 |
| <i>var. wellsii</i>     | Zika 18451 (4x)                                      |              |              |       |    |       |             |
| <i>C. orbicularis</i>   | British Columbia:<br>JBP8365*                        | 0.02 ±0.004  | 0.952 ±0.040 | 0.675 | 11 | E+H   | 343-345     |
| <i>C. phippii</i>       | Washington: JC178<br>(4x)*                           | 0.032 ±0.004 | 0.867 ±0.065 | 0.68  | 9  | E+H   | 343-344     |
| <i>C. germanica</i>     | Morton Arboretum<br>6216V93 (2x)*                    | 0.006 ±0.001 | 0.972 ±0.064 | 0.681 | 8  | basal | 340-341     |
|                         | Turkey: A.A. Dönmez<br>11600 (2x; voucher in<br>HUB) | 0.002 ±0.001 | 0.556 ±0.165 | 0.682 | 3  | basal | 340         |
| <i>C. kansuensis</i>    | Arnold Arboretum:<br>AA101-2001 (4x)                 | 0.01 ±0.004  | 0.614 ±0.130 | 0.685 | 8  | G     | 344         |
| <i>C. maximowiczii</i>  | Russia: T. Romankova<br>5 (2x)                       | 0.015 ±0.006 | 0.6 ±0.154   | 0.642 | 6  | G     | 343 - 344   |
|                         | Russia: T. Romankova                                 | 0.003 ±0.001 | 0.727 ±0.113 | 0.681 | 6  |       | 343 - 344   |

|                                  |                                          |              |              |       |    |           |              |
|----------------------------------|------------------------------------------|--------------|--------------|-------|----|-----------|--------------|
|                                  | 4 (2x)*                                  |              |              |       |    |           |              |
| <i>C. nigra</i>                  | Bulgaria: K. I.<br>Christensen 294 (2x)* | 0.011 ±0.005 | 0.848 ±0.104 | 0.674 | 8  | A2        | 341-342      |
| <i>C. wilsonii</i>               | Arnold Arboretum:<br>AA749-74A (2x)*     | 0.009 ±0.003 | 0.873 ±0.089 | 0.676 | 8  | G         | 343-345      |
| <i>C. ×cogswellii</i>            | Oregon: EL-85 (2x)*                      | 0.025 ±0.004 | 0.981 ±0.031 | 0.674 | 13 | A2+H      | 341-344      |
|                                  | Oregon: EL-79 (2x)*                      | 0.028 ±0.006 | 0.929 ±0.084 | 0.672 | 6  | A2+H      | 341-343      |
| <i>C. ×ninae-celottiae</i>       | Ontario: MP85 (2x)*                      | 0.026 ±0.004 | 0.952 ±0.096 | 0.685 | 6  | A2+E      | 341, 344     |
|                                  | Ontario: MP86 (2x)*                      | 0.011 ±0.004 | 0.873 ±0.071 | 0.675 | 6  | A2+E      | 341-342, 344 |
| <i>Amelanchier<br/>alnifolia</i> | British Columbia:<br>JC431 (3x)*         | 0.006 ±0.002 | 0.643 ±0.184 | 0.677 | 4  | outgroups | 340-341      |

APPENDIX 2: GenBank identifiers for the ITS2 sequences were used for the current analyses. Species and voucher orders follow Table 1.

***C. brachyacantha***

Louisiana: 5206: KC173639, KC173640, KC173641, KC173642.

Louisiana: 2003-32: KC173746, KC173747, KC173748, KC173749, KC173750.

Louisiana: 2011-2: KC173751, KC173752, KC173753, KC173754, KC173755, KC173756.

***C. crus-galii***

Alabama: NT213a: KC173610, KC173611, KC173612, KC173613, KC173614, KC173615, KC173616, KC173617, KC173618, KC173619, KC173620, KC173621.

***C. macracantha***

Ontario: NT224: KC173847, KC173848, KC173849, KC173850, KC173851, KC173852, KC173853, KC173854, KC173855, KC173856.

Colorado: NT440: KC173933, KC173934, KC173935, KC173936, KC173937, KC173938, KC173939, KC173940, KC173941, KC173942, KC173943, KC173944, KC173945, KC173946.

Montana: 2001-17: KC174090, KC174091, KC174092, KC174093, KC174094, KC174095, KC174096, KC174097, KC174098, KC174099.

***C. punctata***

Ontario: MP73: KC173694, KC173695, KC173696, KC173697, KC173698, KC173699, KC173700, KC173701.

Ontario: BB4: KC174266, KC174267, KC174268, KC174269, KC174270, KC174271.

Ontario: s.n.: KC174272, KC174273, KC174274, KC174275.

***C. chrysocarpa***

Washington: s.n.: KC173834, KC173835, KC173836, KC173837, KC173838, KC173839, KC173840, KC173841, KC173842, KC173843, KC173844, KC173845, KC173846.

British Columbia: NT587: KC173947, KC173948, KC173949, KC173950, KC173951, KC173952, KC173953, KC173954, KC173955, KC173956.

***C. monogyna***

Oregon: EL-74: KC173650, KC173651, KC173652, KC173653, KC173654.

Ontario: MP84: KC174184, KC174185, KC174186, KC174187, KC174188, KC174189.

British Columbia: 2008-26: KC173655, KC173656, KC173657, KC173658, KC173659, KC173660, KC173661, KC173662.

Ontario: MP98: KC173643, KC173644, KC173645, KC173646, KC173647, KC173648, KC173649.

***C. pentagyna***

Turkey: s.n.: KC174276, KC174277, KC174278, KC174279, KC174280, KC174281, KC174282.

***C. pinnatifida***

Russia: 2: KC173714, KC173715, KC173716, KC173717, KC173718, KC173719.

Russia: 6: KC173720, KC173721, KC173722, KC17373, KC17374, KC17375, KC17376.

Russia: 3: KC173727, KC173728, KC173729, KC173730, KC173731, KC173732, KC173733, KC173734.

***C. erythropoda***

Colorado: NT349: KC174160, KC174161, KC174162, KC174163, KC174164, KC174165, KC174166, KC174167, KC174168, KC174169.

New Mexico: NT358: KC174151, KC174152, KC174153, KC174154, KC174155, KC174156, KC174157, KC174158, KC174159.

***C. rivularis***

Wyoming: 2001-42: KC173787, KC173788, KC173789, KC173790, KC173791, KC173792.

Nevada: 2007-03: KC173793, KC173794, KC173795, KC173796, KC173797, KC173798, KC173799, KC173800, KC173801, KC173802.

Idaho: EL-199: KC173803, KC173804, KC173805, KC173806, KC173807, KC173808, KC173809, KC173810, KC173811, KC173812.

Colorado: NT373: KC174100, KC174101, KC174102, KC174103.

Utah: 2001-05: KC174104, KC174105, KC174106, KC174107, KC174108, KC174109, KC174110, KC174111, KC174112.

***C. saligna***

Utah: 2004-05: KC173434, KC173435, KC173436, KC173437.

Colorado: NT371: KC173813, KC173814, KC173815, KC173816, KC173817.

Colorado: NT368: KC173818, KC173819, KC173820, KC173821, KC173822, KC173823, KC173824, KC173825.

***C. castlegarensis***

Oregon: C-2003-23F: KC173757, KC173758, KC173759, KC173760, KC173761, KC173762, KC173763.

California: 2006-13: KC173857, KC173858, KC173859, KC173860, KC173861, KC173862, KC173863, KC173864, KC173865, KC173866, KC173867, KC173868, KC173869, KC173870.

Saskatchewan: 2007-15: KC173998, KC173999, KC17400, KC17401, KC17402, KC17403, KC17404, KC17405, KC17406, KC17407, KC17408, KC17409, KC17410.

Idaho: EL-192: KC173982, KC173983, KC173984, KC173985, KC173986, KC173987, KC173988, KC173989, KC173990, KC173991, KC173992, KC173993, KC173994, KC173995, KC173996, KC173997.

***C. douglasii***

Ontario: EL-11: KC173438, KC173439, KC173440, KC173441, KC173442, KC173443, KC173444, KC173445, KC173446, KC173447, KC173448, KC173449, KC173450.

Ontario: 2007-22: KC173764, KC173765, KC173766, KC173767, KC173768, KC173769, KC173770, KC173771, KC173772, KC173773, KC173774.

Idaho: EL-166: KC173451, KC173452, KC173453, KC173454, KC173455, KC173456, KC173457, KC173458, KC173459, KC173460, KC173461, KC173462, KC173463, KC173464.

Montana: EL-32: KC173775, KC173776, KC173777, KC173778, KC173779, KC173780, KC173781, KC173782, KC173783, KC173784, KC173785, KC173786.

British Columbia: 2010-28: KC174027, KC174028, KC174029, KC174030, KC174031, KC174032, KC174033, KC174034, KC174035, KC174036, KC174037, KC174038, KC174039, KC174040.

British Columbia: 2010-29: KC174041, KC174042, KC174043, KC174044, KC174045, KC174046, KC174047, KC174048, KC174049, KC174050, KC174051, KC174052.

British Columbia: 2010-36: KC173874, KC173875, KC173876, KC173877, KC173878, KC173879, KC173880, KC173881, KC173882, KC173883, KC173884, KC173885, KC173886.

Ontario: NT611: KC173965, KC173966, KC173967, KC173968, KC173969, KC173970, KC173971, KC173972, KC173973, KC173974.

British Columbia: JC387: KC173975, KC173976, KC173977, KC173978, KC173979, KC173980, KC173981.

British Columbia: 2008-72: KC173710, KC173711, KC173712, KC173713.

British Columbia: 2010-38: KC173559, KC173560, KC173561, KC173562, KC173563, KC173564, KC173565, KC173566, KC173567, KC173568, KC173569, KC173570, KC173571, KC173572, KC173573, KC173574, KC173575, KC173576.

British Columbia: 2010-31: KC173539, KC173540, KC173541, KC173542, KC173543, KC173544, KC173545, KC173546, KC173547, KC173548, KC173549, KC173550, KC173551, KC173552, KC173553, KC173554, KC173555, KC173556, KC173557, KC173558.

Montana: JC296: KC173622, KC173623, KC173624, KC173625, KC173626.

### ***C. okennonii***

Washington: EL-152: KC173464, KC173465, KC173466, KC173467, KC173468, KC173469, KC173470, KC173471, KC173472, KC173473, KC173474, KC173475, KC173476, KC173477.

Montana: JC281: KC173627, KC173628, KC173629, KC173630, KC173631, KC173632, KC173633, KC173634, KC173635, KC173636, KC173637, KC173638.

Washington: EL-153: KC173478, KC173479, KC173480, KC173481, KC173482, KC173483, KC173484, KC173485, KC173486, KC173487.

### ***C. shuswapensis***

British Columbia: 2007-11: KC173926, KC173927, KC173928, KC173929, KC173930, KC173931, KC173932.

### ***C. suksdorfii***

Washington: 18485: KC173513, KC173514, KC173515, KC173516, KC173517, KC173518, KC173519, KC173520, KC173521.

California: 2006-22: KC173522, KC173523, KC173524, KC173525, KC173526, KC173527, KC173528, KC173529, KC173530.

California: 2006-16: KC173531, KC173532, KC173533, KC173534, KC173535, KC173536, KC173537, KC173538.

Oregon: JC092: KC173957, KC173958, KC173959, KC173960, KC173961, KC173962, KC173963, KC173964.

Oregon: JC119: KC174144, KC174145, KC174146, KC174147, KC174148, KC174149, KC174150.

Oregon: EL-68: KC173577, KC173578, KC173579, KC173580, KC173581, KC173582, KC173583, KC173584, KC173585, KC173586.

Oregon: EL-71: KC173663, KC173664, KC173665, KC173666, KC173667, KC173668.

Oregon: JC039: KC173887, KC173888, KC173889, KC173890, KC173891, KC173892, KC173893.

Oregon: JC060: KC173587, KC173588, KC173589, KC173590, KC173591, KC173592.

Oregon: JC098: KC173595, KC173596, KC173597, KC173598, KC173599, KC173600, KC173601, KC173602, KC173603, KC173604.

Oregon: JC136: KC173605, KC173606, KC173607, KC173608, KC173609.

Oregon: JC102: KC174113, KC174114, KC174115, KC174116, KC174117.

Oregon: JC117: KC174118, KC174119.

Oregon: JC118: KC174178, KC174179, KC174180, KC174181, KC174182, KC174183.

Oregon: EL-65: KC173506, KC173507, KC173508, KC173509, KC173510, KC173511, KC173512.

Idaho: EL-172: KC173871, KC173872, KC173873.

Idaho: EL-188: KC173826, KC173827, KC173828, KC173829, KC173830, KC173831, KC173832, KC173833.

British Columbia: 2010-42: KC173906, KC173907, KC173908, KC173909, KC173910, KC173911, KC173912, KC173913, KC173914, KC173915.

British Columbia: JC385: KC173916, KC173917, KC173918, KC173919, KC173920, KC173921, KC173922, KC173923, KC173924, KC173925.

Montana: EL-30: KC173488, KC173489, KC173490, KC173491, KC173492, KC173493, KC173494, KC173495, KC173496, KC173497, KC173498, KC173499, KC173500, KC173501, KC173502, KC173503, KC173504, KC173505.

British Columbia: 2008-38: KC174011, KC174012, KC174013, KC174014, KC174015, KC174016, KC174017, KC174018, KC174019, KC174020, KC174021, KC174022, KC174023, KC174024, KC174025, KC174026.

### ***C. gaylussacia***

California: PORE-509-1: KC174062, KC174063, KC174064, KC174065, KC174066, KC174067, KC174068.

California: JC005: KC174069, KC174070, KC174071, KC174072, KC174073, KC174074, KC174075, KC174076.

California: JC014: KC174077, KC174078, KC174079, KC174080, KC174081, KC174082, KC174083.

California: JC018: KC174084, KC174085, KC174086, KC174087, KC174088, KC174089.

Oregon: EL-57: KC174053, KC174054, KC174055, KC174056, KC174057, KC174058, KC174059, KC174060, KC174061.

### ***C. rivuloadamensis***

Saskatchewan: 2007-13: KC174253, KC174254, KC174255, KC174256, KC174257, KC174258, KC174259, KC174260, KC174261, KC174262, KC174263, KC174264, KC174265.

***C. rivulopugnensis***

Saskatchewan: 2007-21: KC174242, KC174243, KC174244, KC174245, KC174246, KC174247, KC174248, KC174249, KC174250, KC174251, KC174252.

***C. aquacervensis***

Saskatchewan: 2007-12: KC174222, KC174223, KC174224, KC174225, KC174226, KC174227, KC174228, KC174229, KC174230.

***C. atrovirens***

British Columbia: JBP8344: KC174196, KC174197, KC174198, KC174199, KC174200, KC174201, KC174202, KC174203, KC174204, KC174205, KC174206, KC174207, KC174208, KC174209.

***C. cupressocollina***

Saskatchewan: 2007-20: KC174231, KC174232, KC174233, KC174234, KC174235, KC174236, KC174237, KC174238, KC174239, KC174240, KC174241.

***C. enderbyensis***

British Columbia: 18445: KC173894, KC173895, KC173896, KC173897, KC173898, KC173899, KC173900, KC173901, KC173902, KC173903, KC173904, KC173905.

British Columbia: 18451: KC174129, KC174130, KC174131, KC174132, KC174133, KC174134, KC174135, KC174136, KC174137, KC174138, KC174139, KC174140, KC174141, KC174142, KC174143.

***C. okanaganensis***

British Columbia: 2008-46: KC174170, KC174171, KC174172, KC174173, KC174174, KC174175, KC174176, KC174177.

***C. orbicularis***

British Columbia: JBP8365: KC174210, KC174211, KC174212, KC174213, KC174214, KC174215, KC174216, KC174217, KC174218, KC174219, KC174220, KC174221.

***C. phippi***

Washington: JC178: KC174120, KC174121, KC174122, KC174123, KC174124, KC174125, KC174126, KC174127, KC174128.

***C. germanica***

Russia: 6216V93: KC173735, KC173736, KC173737, KC173738, KC173739, KC173740, KC173741, KC173742.

Turkey: AAD11600: KC173743, KC173744, KC173745.

***C. kansuensis***



? : 2002-02A: KC173426, KC173427, KC173428, KC173429, KC173430, KC173431, KC173432, KC173433.

***C. maximowiczii***

Russia: 5: KC173406, KC173407, KC173408, KC173409, KC173410, KC173411.

Russia: 4: KC173412, KC173413, KC173414, KC173415, KC173416, KC173417.

***C. nigra***

Bulgaria: KIC 294: KC173702, KC173703, KC173704, KC173705, KC173706, KC173707, KC173708, KC173709.

***C. wilsonii***

? : AA749-74A: KC173418, KC173419, KC173420, KC173421, KC173422, KC173423, KC173424, KC173425.

***C. ×cogswellii***

Oregon: EL-85: KC173669, KC173670, KC173671, KC173672, KC173673, KC173674, KC173675, KC173676, KC173677, KC173678, KC173679, KC173680, KC173681.

Oregon: EL-79: KC173682, KC173683, KC173684, KC173685, KC173686, KC173687.

***C. ×ninae-celottiae***

Ontario: MP85: KC174190, KC174191, KC174192, KC174193, KC174194, KC174195.

Ontario: MP86: KC173688, KC173689, KC173690, KC173691, KC173692, KC173693.

***Amelanchier alnifolia***

British Columbia: JC431: KC174283, KC174284, KC174285, KC174286.

TABLE S3. GenBank accession numbers for the plastid sequences used for the current analyses. Species and voucher orders follow Table 1. GenBank accession numbers are in the order *trnL-F*, *trnG-trnS*, *rpl2-trnH*, *rpl20-rps12*. – indicates no sequence generated.

---

Ingroup

*C. brachyacantha* Louisiana: 2003-32 (2x) KC206775, KC206671, KC206837, KC206926. *C. crus-galii* Alabama: NT213a (2x) KC206763, KC206754, KC206839, KC206928. *C. macracantha* Ontario: NT224 (4x) KC206788, KC206721, KC206853, KC206942. *C. punctata* Ontario: *s.n.* (2x) KC206834, KC206746, -, -. *C. chrysocarpa* Washington: *s.n.* (4x) KC206790, KC206720, KC206852, KC206941. *C. triflora* Georgia: NT290 (4x) KC206835, KC206753, KC206879, KC206966. *C. monogyna* Ontario: MP84 (2x) KC206802, KC206728, KC206859, KC206947. *C. pentagyna* Turkey: *s.n.* (2x) KC206827, KC206759, KC206878, KC206965. *C. pinnatifida* Russia: 2 (2x) KC206799, KC206724, KC206844, KC206933. *C. erythropoda* Colorado: NT349 (4x) KC206817, KC206736, KC206866, KC206954. *C. rivularis* Wyoming: 2001-42 (4x) KC206776, KC206737, KC206845, KC206934. *C. saligna* Utah: 2004-05 (2x) KC206778, KC206742, KC206846, KC206935. *C. castlegarensis* Oregon: C-2003-23F (4x) KC206764, KC206674, KC206838, KC206927. *C. douglasii* British Columbia: 2010-36 (4x) KC206797, KC206700, KC206855, KC206944, British Columbia: JC387 (4x) KC206820, KC206709, KC206868, KC206956, British Columbia: 2010-38 (5x): KC206798, KC206699, KC206856, KC206945, British Columbia: 2010-31 (5x) KC206796, KC206698, KC206854, KC206943. *C. okennonii* Washington: EL-152 (4x) KC206768, KC206683, KC206843, KC206932. *C. shuswapensis* British Columbia: 2007-11 (4x) KC206779, KC206685, KC206847, KC206936. *C. suksdorfii* Washington: 18485 (2x) KC206784, KC206690, KC206849, KC206938, Idaho: EL-172 (3x) KC206785, KC206691, KC206850, KC206939, British Columbia: 2010-42 (3x) KC206819, KC206706, KC206867, KC206955, British Columbia: JC385 (3x) KC206821, KC206710, KC206869, KC206957. *C. gaylussacia* California: PORE-509-1 (3x) KC206810, KC206713, KC206863, KC206951. *C. rivuloadamensis* Saskatchewan: 2007-13 (4x) KC206829, KC206749, KC206876, KC206964. *C. rivulopugnensis* Saskatchewan: 2007-21 (4x) KC206831, KC206748, KC206875, KC206963. *C. aquacervensis* Saskatchewan: 2007-12 (4x) KC206832, KC206756, KC206873, KC206961. *C. atrovirens* British Columbia: JBP8344 KC206828, KC206758, KC206871, KC206959. *C. cupressocollina* Saskatchewan: 2007-20 (4x) KC206830, KC206752, KC206874, KC206962. *C. enderbyensis* British Columbia: 18445 (4x) KC206809, KC206712, KC206862, KC206950. *C. okanaganensis* British Columbia: 2008-46 (4x) KC206816, KC206718, KC206865, KC206953. *C. orbicularis* British Columbia: JBP8365, KC206824, KC206757, KC206872, KC206960. *C. phippsi* Washington: JC178 (4x) KC206825, KC206755, KC206870, KC206958. *C. germanica* Russia: 6216V93 (2x) KC206772, -, KC206840, KC206929. *C. maximowiczii* Russia: 4 (2x) KC206773, KC206682, KC206841, KC206930. *C. nigra* Bulgaria: KIC 294 (2x) KC206774, KC206719, KC206842, KC206931. *C. wilsonii* AA749-74A (2x) KC206787, KC206732, KC206851, KC206940. *C. ×cogswellii* Oregon: EL-85 (2x) KC206805, KC206750, KC206860, KC206948. Oregon: EL-79 (2x) KC206836, KC206751, KC206861, KC206949. *C. ×ninae-celottiae* Ontario: MP85 (2x) KC206822, KC206761, KC206857, KC206945, Ontario: MP86 (2x) KC206801, KC206727, KC206858, KC206946.

Outgroup

*Amelanchier alnifolia* British Columbia: JC431 (3x) KC206800, KC206745, KC206880, KC206967. *Cotoneaster taoensis* GenBank JQ392203, JQ391914, JQ392094, JQ390794. *Malus angustifolia* GenBank AM157404, EF127116, EF127190, EF127227. *Pyrus pyrifolia* GenBank AP012207, AP012207, AP012207, AP012207.

---
